# Supplementary material for: A dual input DNA-based molecular switch
Source: Royal Society of Chemistry journal article supplement (doi:10.1039/c4mb00363b), 2014-07-23
Supplement: c4mb00363b1.pdf [file c4mb00363b1.pdf]

## ELECTRONIC SUPPORTING INFORMATION

# Dual Input DNA-Based Molecular Switch

Irina V. Nesterova,\* Siddieg O. Elsiddieg, Evgueni E. Nesterov

### Table of Contents

|                                                     |    |
|-----------------------------------------------------|----|
| Materials                                           | S2 |
| Experimental Procedures                             | S2 |
| pH denaturation studies via Circular Dichroism (CD) | S2 |
| pH denaturation studies via UV spectroscopy         | S2 |
| Thermal denaturation studies via UV spectroscopy    | S3 |
| Polyacrylamide Gel Electrophoresis                  | S3 |
| Fluorescence experiments                            | S4 |
| SI References                                       | S5 |
| Table S1                                            | S6 |

## Materials

All the chemicals of “Reagent” grade or above were obtained from established commercial suppliers (e.g. Sigma-Aldrich (St. Louis, MO), VWR/Alfa Aesar (West Chester, PA), and others) and were used as received unless otherwise noted. Nuclease-free water (Promega, Madison, WI) was used for all sample preparation involving DNA. In-house DI water was used for preparation of buffers for PAGE experiments. Sodium phosphate (20 mM)/potassium chloride (100mM) buffers for pH-dependent CD measurements were prepared in house. Bst large fragment polymerase, dNTPs, BSA, 50-bp DNA ladder, NEBuffer 1 (NEB 1, 10 mM Bis-Tris-Propane-HCl, 10 mM MgCl<sub>2</sub>, 1 mM Dithiothreitol, pH 7.0) and NEBuffer 2 (NEB 2, 50 mM NaCl, 10 mM Tris-HCl, 10 mM MgCl<sub>2</sub>, 1 mM Dithiothreitol, pH 7.9) were obtained from New England Biolabs (Ipswich, MA). Acrylamide/Bis 29:1 (30%) was purchased from BioRad. Bromphenol blue gel loading buffer was obtained from Sigma-Aldrich (St. Louis, MO). Single stranded DNAs (sequences included in Table S1) were obtained from IDT (Coralville, IA) and reconstituted with nuclease-free water. SYBR Green I and SYBR Gold were obtained from Invitrogen (Carlsbad, CA).

## Experimental procedures

### pH denaturation studies via Circular Dichroism (CD)

CD experiments were conducted using a J-815 Circular Dichroism Spectrometer (Jasco, Easton, MD) equipped with a Peltier-based thermostatted sample compartment.

Samples containing **I<sub>i</sub>** (at  $\sim 3 \times 10^{-6}$  M) were prepared in appropriate phosphate buffers, heated at 95°C for 10 minutes, slowly (overnight) cooled to room temperature. Three scans for each sample were recorded using a 0.1 cm optical path cuvette, averaged, and corrected for a corresponding buffer blank. The i-motif formation was monitored at 290 nm where C-quadruplexes are responsible for a characteristic positive band, while single stranded fragments are characterized by a positive band at 260-280 nm.<sup>1</sup>

### pH Denaturation studies via UV spectroscopy

pH Denaturation studies via UV spectroscopy were performed using a Cary 5000 UV-Vis-NIR spectrophotometer (Agilent Technologies, Santa Clara, CA). Typically, measurements were performed on a 500- $\mu$ L aliquot of a 0.5-1.0  $\mu$ M sample (prepared as described above for CD-based measurements) using a 10 mm optical path cuvette. The i-motif transformations were monitored at 295 nm where C-quadruplex unfolding is accompanied by the hypochromic effect.<sup>2</sup> The measurements were taken at room temperature and corrected against corresponding blank buffers.

## Thermal denaturation studies via UV spectroscopy

The thermal denaturation studies were conducted as described by us before.<sup>3</sup> Briefly, the samples containing approx. 500 nM of **I<sub>i</sub>** were equilibrated at 80°C for 30 minutes before beginning a cooling cycle. Upon completion of the cooling cycle, the samples were stored overnight at 5°C (refrigerated) and, on the next morning, equilibrated to the lowest temperature of the temperature range evaluated (12-15°C) in a sample compartment of a spectrometer for 30 min before heating cycle began. Temperature gradients of 0.2°C min<sup>-1</sup> were used. Concentrations used for the denaturation studies (~500 nM) were below the range in which monomolecular folded hairpin (1 μM-1 mM)<sup>4</sup> or i-motif (2-10 μM)<sup>5</sup> have been demonstrated. Cary 5000 UV-Vis-NIR spectrophotometer (Agilent Technologies, Santa Clara, CA) equipped with a Cary Dual Cell Peltier Accessory (Varian, Palo Alto, CA) was utilized. The measurements were taken every 1°C. The differential spectra (obtained by subtraction of sample spectrum obtained at the lowest temperature (15°C) from the spectrum obtained at the highest temperature (80°C)) were evaluated to derive the best wavelength for a conformation change monitoring. Changes at 295 nm are exclusively indicative of i-motif opening. Those observations agree well with literature.<sup>6</sup>

## Polyacrylamide Gel Electrophoresis

A 50 μL sample containing one of the oligonucleotides **p**, **I<sub>h</sub>**, **I<sub>i</sub>** or **I<sub>s</sub>** (28 nM) in NEB 1 or NEB 2 was prepared by heating the solution at 95°C for 10 minutes followed by slow (overnight) cooling to room temperature. After addition of BSA (to yield 100 μg/mL), dNTP mixture (to yield 400 μM each), and DNA template **II** (final concentration of 28 nM) the resulting solution was incubated at 37°C for 600 seconds in a VWR dry block heater (West Chester, PA). Following the incubation, 0.4 unit of Bst large fragment polymerase was added to the sample and reaction

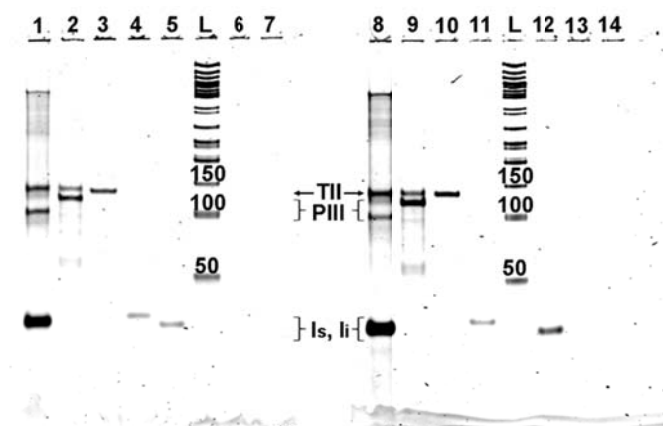

**Figure S1.** Raw image of a non-denaturing polyacrylamide gel demonstrating: (i) separation between single-stranded template **II** (**TII**) and double-stranded product **III** (**PIII**) (Lines 1, 2, 8, 9) and (ii) no interference from potential self-primed extension of **p** (lines 7 and 14), **I<sub>h</sub>** (lines 6 and 13), **I<sub>s</sub>** (lines 5 and 12), **I<sub>i</sub>** (lines 4 and 11) and **TII** (lines 3 and 10). Non-denaturing PAGE (12 %) separations of reactions conducted in NEB 1 (Lines 1-7) and NEB 2 (lines 8-14) were performed using conditions described in the SI text. A 50-bp DNA ladder was analyzed in line L. Polymerase extension reactions containing **I<sub>s</sub>** and **TII** (lines 1 and 8) and primer **p** and **TII** (lines 2 and 9) were included to provide markers for corresponding extension products. Note, that PAGE conditions necessary to separate **TII** and **PIII** do not allow detecting short strands **I<sub>h</sub>** and **p** (lines 6, 7, 13, 14) on the same gel, however, no interferences at the area of expected **PIII** migration and no self-primed extension are intended goals of analyzing the samples. All the sequences are included in Table S1.

was allowed to proceed for 1200 seconds at 37°C. After the appropriate time, the reaction was quenched by adding 8  $\mu\text{L}$  of gel loading buffer and immediate cooling to 0°C (on ice). The samples were kept refrigerated until ready for electrophoresis. A 12  $\mu\text{L}$  aliquot of the reaction mixture was injected on the gel.

12% non-denaturing polyacrylamide gel electrophoresis (PAGE) experiments were carried out using Vertical Gel Electrophoresis System (VWR, West Chester, PA). The separation was performed in 0.5 $\times$ TBE at room temperature at  $\sim 15 \text{ V cm}^{-1}$  for 2 hours. The 12 % gels (0.5 $\times$ TBE) were prepared in house with Acrylamide/Bis 29:1, Ammonium Persulfate and TEMED using standard protocols and were stained post-separation with SYBR Gold for 30 minutes. Stained gels were imaged on a Typhoon 9410 scanner (GE, Fairfield, CT) using a 488 nm laser for excitation and a 555 $\pm$ 20 nm filter for signal collection.

A representative gel image demonstrating (1) separation of reaction product **III** (**PIII**) and template **II** (**TII**), and (2) non-interference from potential self-primed extension products of template **II**, **p**, **I<sub>h</sub>**, **I<sub>s</sub>** and **I<sub>h</sub>** is included in Figure S1.

### Fluorescence experiments

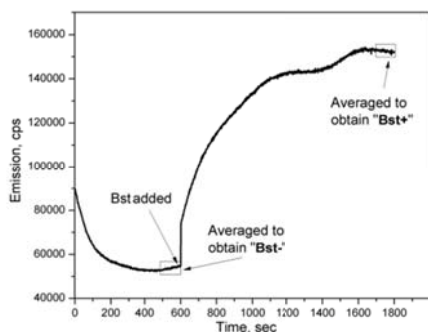

**Figure S2.** Emission (525 nm) of SYBR Green I in a sample containing oligonucleotide **p**, BSA, dNTPs, DNA template **II** in NEB 1 before and after addition of Bst polymerase (at 600 sec). Increase in emission after addition of Bst is caused by the enhanced sensitivity of SYBR Green I towards double stranded polymerase extension product formed.

Time-based fluorescence measurements were carried out with a QuantaMaster4/2006SE spectrofluorimeter (PTI, Birmingham, NJ) equipped with a temperature-controlled cuvette holder. A 60  $\mu\text{L}$  sample containing either **p**, **I<sub>h</sub>**, **I<sub>i</sub>** or **I<sub>s</sub>** (28 nM) in NEB 1 or NEB 2 was prepared by heating the solution at 95°C for 10 minutes followed by slow (overnight) cooling down to room temperature. After addition of BSA (to yield 100  $\mu\text{g/mL}$ ), dNTP mixture (to yield 400  $\mu\text{M}$  each), DNA template **II** (final concentration of 28 nM) and SYBR Green I (to yield 0.05 $\times$ ), a 50  $\mu\text{L}$  aliquot of the resulting mixture was transferred into an appropriate fluorescence cuvette and equilibrated for 600 seconds at 37°C in the thermo-controlled cuvette holder of the spectrofluorimeter. Emission at 525 nm (excitation at 497 nm) was monitored during the time to ensure a stable baseline. The last 120 seconds of the stabilized baseline were averaged to obtain (after normalization) the “**Bst-**”

value (Figure 3 in the main text). Post equilibration, 0.4 unit of Bst large fragment polymerase was added to the cuvette and a 525-nm emission monitoring was continued for 1200 seconds. The last 120 seconds

of the measurements were averaged to obtain the “Bst+“ value (Figure 3 in the main text). An example of emission monitoring graph is presented in Figure S2.

## SI References

- (1) (a) Kypr, J.; Kejnovská, I.; Renčiuk, D.; Vorličková, M. *Nucleic Acids Res.* **2009**, *37*, 1713-1725; (b) Manzini, G.; Yathindra, N.; Xodo, L. E. *Nucleic Acids Res.* **1994**, *22*, 4634-4640; (c) Völker, J.; Klump, H. H.; Breslauer, K. J. *Biopolymers* **2007**, *86*, 136-147.
- (2) Mergny, J. L.; Lacroix, L. *Nucleic Acids Res.* **1998**, *26*, 4797-4803.
- (3) Nesterova, I. V.; Elsiddieg, S. O.; Nesterov, E. E. *J. Phys. Chem. B* **2013**, *117*, 10115-10121.
- (4) Senior, M. M.; Jones, R. A.; Breslauer, K. J. *Proc. Natl. Acad. Sci. U. S. A.* **1988**, *85*, 6242-6246.
- (5) Mergny, J. L.; Lacroix, L.; Han, X. G.; Leroy, J. L.; Hélène, C. *J. Am. Chem. Soc.* **1995**, *117*, 8887-8898.
- (6) (a) Mergny, J. L.; Lacroix, L. *Oligonucleotides* **2003**, *13*, 515-537; (b) Mergny, J.-L.; Li, J.; Lacroix, L.; Amrane, S.; Chaires, J. B. *Nucleic Acids Res.* **2005**, *33*, e138.
